1 **Climatic drivers of seasonal dynamics for Respiratory Syncytial Virus (RSV) in**  
2 **Antananarivo, Madagascar, 2011-2021**

3  
4 Tsiry Hasina RANDRIAMBOLAMANANTSOA<sup>1</sup>, Norosoa Harline RAZANAJATOVO<sup>1</sup>,  
5 Hafaliana Christian RANAIVOSON<sup>2, 3</sup>, Laurence RANDRIANASOLO<sup>1</sup>, Joelinotahiana  
6 Hasina RABARISON<sup>1</sup>, Helisoa RAZAFINMANJATO<sup>1</sup>, Arvé RATSIMBAZAFY<sup>1</sup>, Danielle  
7 Aurore Doll RAKOTO<sup>4</sup>, Jean-Michel HERAUD<sup>1\*#</sup>, Vincent LACOSTE<sup>1\*</sup>, Cara E. BROOK<sup>2\*</sup>

8  
9 <sup>1</sup> National Influenza Center, Virology Unit, Institut Pasteur de Madagascar, 101 Antananarivo,  
10 Madagascar;

11 <sup>2</sup> Department of Ecology and Evolution, University of Chicago, Chicago, IL, United States;

12 <sup>3</sup> Department of Zoology and Animal Biodiversity, University of Antananarivo, 101  
13 Antananarivo, Madagascar;

14 <sup>4</sup> Doctoral school of Life and Environment Sciences ole, Faculty of Sciences, University of  
15 Antananarivo, 101 Antananarivo, Madagascar.

16 \*: Equally contributor. Co-senior authors

17 #: Present address: Global Influenza Programme, World Health Organization, Geneva,  
18 Switzerland.

19  
20 **Keywords:** Respiratory Syncytial Virus, TSIR, Madagascar, force of infection, climate drivers  
21 of disease

22  
23 **Structured Abstract**

24 *Introduction*

25 Respiratory Syncytial Virus (RSV) is a primary source of acute lower respiratory tract infection  
26 (ALRTI), the leading cause of death in children under five. Over 99% of RSV-attributed deaths  
27 occur in low-income countries, including Madagascar. RSV transmission is linked to climate,  
28 driving highly seasonal dynamics.

29 *Methods*

30 We used generalized additive models (GAMs) to identify correlates of reported RSV infections  
31 in Antananarivo, Madagascar from January 2011-December 2021, then fit catalytic models to  
32 cumulative age-structured incidence to estimate age-specific force of infection (FOI). We fit a  
33 time series Susceptible-Infected-Recovered (TSIR) model to the dataset to estimate weekly

NOTE: This preprint reports new research that has not been certified by peer review and should not be used to guide clinical practice.

34 RSV transmission, then evaluated associations with precipitation, humidity, and temperature  
35 using generalized linear models. We used GAMs to quantify interannual trends in climate and  
36 assess whether significant deviations in RSV burden occurred in years representing climatic  
37 anomalies.

### 38 *Results*

39 Reported RSV infections in Antananarivo were significantly associated with patient ages  $\leq 2$   
40 years. Highest FOI was estimated in patients  $\leq 1$  year, with transmission declining to near-zero  
41 by age five before rising in older (60+) cohorts. TSIR models estimated a January–February  
42 peak in RSV transmission, which was strongly positively associated with precipitation and  
43 more weakly with temperature but negatively related to relative humidity. Precipitation,  
44 humidity, and temperature all increased across the study period in Antananarivo, while reported  
45 RSV infections remained stable. Significant deviations in RSV burden were not associated with  
46 clear climate anomalies.

### 47 *Conclusions*

48 Stable rates of reported RSV infections in Antananarivo across the past decade may reflect  
49 contrasting impacts of elevated precipitation and increased humidity on transmission. If future  
50 climate changes yield more rapidly accelerating precipitation than humidity, this could  
51 accelerate RSV burden. Introduction of recently-developed public health interventions to  
52 combat RSV in low-income settings like Madagascar is essential to mitigating burden of disease  
53 (RSV), in particular any future climate-driven increases in transmission or severity.

54

### 55 **Key Messages**

- 56 • *What is already known on this topic:* RSV is an important driver of acute lower respiratory  
57 tract infections, which represent the leading cause of mortality in children under five  
58 across the globe. RSV demonstrates highly seasonal dynamics, as its transmission is  
59 linked to climate.
- 60 • *What this study adds:* We quantified correlates of RSV infection and estimated the  
61 seasonal transmission rate for RSV from reported patient data in Antananarivo,  
62 Madagascar. We found that RSV transmission is primarily concentrated in very young  
63 children ( $\leq 1$  year) in Antananarivo and positively associated with high precipitation and  
64 low humidity, which focus most transmission in Madagascar's January-February rainy  
65 season.

- 66 • *How this study might affect research, practice, or policy:* Our study suggests that RSV  
67 burden may intensify with future climate change, particularly higher rainfall. We  
68 emphasize the high public health importance of accelerating the introduction of recently-  
69 developed mAbs (Monoclonal Antibody) and vaccination interventions to combat RSV to  
70 low-income settings like Madagascar.

71

## 72 INTRODUCTION

73 Respiratory syncytial virus (RSV) is a highly contagious virus that primarily infects  
74 infants and young children. Worldwide, most children contract RSV before reaching two years  
75 of age ([Andeweg et al. 2021](#)). The virus infects the upper and lower respiratory tracts causing  
76 infections that range from common cold to bronchiolitis and pneumonia. Globally, acute lower  
77 respiratory tract infections (ALRTIs) are the leading cause of death in children under five (CU5)  
78 ([Data 2019](#)), and approximately one-fourth of ALRTIs are estimated to be attributable to RSV  
79 each year ([Nair et al. 2010](#), [Shi et al. 2017](#)). Over 99% of CU5 fatalities from RSV-related  
80 ALRTIs occur in low-income countries ([Nair et al. 2010](#), [Shi et al. 2017](#)). RSV can also affect  
81 older age groups and those immuno-compromised or with comorbidities such as asthma and  
82 other lung diseases, diabetes, and heart failure ([Falsey et al. 2005](#), [Haber 2018](#)). In Madagascar,  
83 RSV remains the most common cause of ALRTI and a major cause of hospital admission in  
84 CU5 ([Razanajatovo et al. 2018](#)). It is estimated that approximately 11 299 hospitalizations per  
85 year can be attributed to RSV in CU5 in Madagascar ([Rabarison et al. 2019](#)). Three years (2010-  
86 2013) of laboratory surveillance from Institut Pasteur de Madagascar (IPM) aimed at  
87 identifying the etiology of severe acute respiratory infections (SARI) showed that nearly 37.7%  
88 of samples were positive for RSV, with the vast majority of patients (81%) representing CU5  
89 ([Razanajatovo et al. 2018](#)). A further 38.9% of SARI surveillance samples collected between  
90 2018-2022 in Madagascar additionally tested positive for RSV, again with the majority  
91 concentrated in CU5 ([Razanajatovo et al. 2022](#)).

92

93 Given the globally significant impact of RSV on childhood morbidity and mortality,  
94 RSV has been the subject of numerous research studies across many countries ([Shi et al. 2017](#),  
95 [O'Brien et al. 2019](#), [Li et al. 2022](#)). Particular areas of focus have included standard reporting  
96 of disease burden, clinical features, and at-risk groups for severe infections—typically aimed  
97 at defining best practices for the monitoring of RSV infection in CU5 and avoiding the misuse  
98 of antibiotics ([Linssen et al. 2021](#), [Obolski et al. 2021](#), [Li et al. 2022](#), [Pinquier et al. 2023](#)). In  
99 addition, considerable work has been devoted to quantification of seasonal transmission

100 dynamics for RSV—in order to better predict the timing and magnitude of severe epidemics  
101 ([Hogan \*et al.\* 2016](#), [Baker \*et al.\* 2019](#), [Wambua \*et al.\* 2022](#)).

102  
103 The seasonality of RSV circulation shows different patterns depending on geographic  
104 location, though most localities are characterized by a clear annual peak in transmission. In  
105 temperate countries, peak cases generally predominate during the colder months—from  
106 September to January in the Northern Hemisphere and from March to June in the Southern  
107 Hemisphere ([Obando-Pacheco \*et al.\* 2018](#)). In tropical and subtropical countries, the timing of  
108 the peak RSV season is more variable across locations, with some studies reporting highest  
109 RSV activity during peak rains ([Sapin \*et al.\* 2001](#), [Mathisen \*et al.\* 2009](#), [Matthew \*et al.\* 2009](#))  
110 and others reporting elevated caseloads during warmest months of the year ([Chew \*et al.\* 1998](#)).  
111 Madagascar has been previously documented as an anomaly in the study of seasonal circulation  
112 for respiratory viruses, particularly influenza, for which transmission is highly irregular  
113 ([Heraud \*et al.\* 2019](#)). RSV circulation, however, is well defined, with burden concentrated in  
114 the first half of each calendar year and the peak in cases between February and March  
115 ([Razanajatovo \*et al.\* 2018](#), [Razanajatovo \*et al.\* 2022](#)).

116  
117 Climate is known to play an important role in driving RSV circulation across diverse  
118 geographic localities ([Shi \*et al.\* 2017](#), [Baker \*et al.\* 2019](#), [Heraud \*et al.\* 2019](#)) but has remained  
119 largely unexplored in Madagascar. Quantitative understanding of the climatic factors that drive  
120 intra-annual seasonality in RSV transmission is essential to predicting how RSV dynamics will  
121 respond to future interannual climatic changes. Here, we aimed to (1) identify statistical  
122 correlates of RSV infection from reported cases of respiratory infection in Antananarivo,  
123 Madagascar over the past decade, (2) estimate variation in the age-structured force of infection  
124 (FOI) for RSV cases in Antananarivo, (3) quantify the seasonality of RSV transmission across  
125 the study period, and (4) identify climatic variables associated with peak RSV transmission.

126

127

## 128 **METHODS**

129

### 130 **Study location and setting**

131 The influenza sentinel surveillance network (ISSN) in Madagascar has been operational  
132 since 1978 ([Rasolofonirina 2003](#), [Randrianasolo \*et al.\* 2010](#)). The aim is to monitor the  
133 circulation of influenza viruses as well as other respiratory viruses of public health concern,

134 such as RSV and, more recently, SARS-CoV-2. The ISSN is comprised of an ILI (Influenza-  
135 Like Illness) surveillance program that now involves 21 referral primary health care centers  
136 (CSB\_R) and a SARI (Severe Acute Respiratory Infection) surveillance program in five  
137 selected hospitals. The ISSN is complemented via the monitoring of death certificate and  
138 mortality data collected from six districts in Antananarivo through the Bureau Municipal  
139 d'Hygiène recently renamed DEAH (Direction de l'Eau, l'Assainissement et l'Hygiène)  
140 ([Rabarison et al. 2023](#))

141  
142 For the present study, we used data collected from sentinel sites in Antananarivo, the  
143 capital city of Madagascar, over 11 years (from January 2011 – December 2021). Antananarivo  
144 is home to around three million inhabitants ([Desa 2018](#)) and hosts a tropical climate profile that  
145 is hot and rainy in summer (November – April) and cold and dry in winter (May – October).  
146 Sites used in our analysis included ILI three sites BHK: Ostie Behoririka (-18.90, 47.53), CSMI  
147 TSL: Centre de Santé Maternelle et Infantile de Tsaralalana (-18.91, 47.53), MJR: Dispensaire  
148 Manjakaray (-18.89, 47.53); and two SARI sites (CENHOSOA: Centre Hospitalier de  
149 Soavinandriana (-18.90, 47.545) and CHUMET (Centre Hospitalier Universitaire Mère-Enfant  
150 Tsaralalàna) (-18.91, 47.52). Respectively, each site serves a catchment population of: 28574  
151 people (BHK); 43222 people (CSMI TSL), 8000 people (MJR), 89000 people (CENHOSOA),  
152 and 43222 people (CHUMET).

## 153 154 **Study subjects**

155 All patients presenting to focal sites with ILI or SARI symptoms were enrolled. Details  
156 on case definitions and enrollment procedures have been previously published. Briefly, ILI  
157 classification criteria refer to patients of any age reporting with (a) a recorded temperature  
158  $\geq 38^{\circ}\text{C}$  or a history of fever and (b) a cough of  $\leq 10$  days duration, who (c) do not require  
159 hospitalization. SARI patients report with these same symptoms but additionally require  
160 hospitalization ([WHO 2013](#)). For each enrolled patient, demographic, socio-economic, clinical,  
161 and epidemiological data were recorded in case report forms.

## 162 163 **Virus detection**

164 Nasopharyngeal specimens were collected for each enrolled patient. After collection,  
165 samples were shipped daily to the Virology Unit at IPM where they were immediately  
166 processed or stored at  $4^{\circ}\text{C}$  until testing (a maximum of 2 days after collection, following WHO  
167 guidelines) ([WHO 2002](#), [WHO 2011](#)). All procedures for the processing of biological samples

168 have been previously described ([Razanajatovo et al. 2011](#)). Briefly, nasopharyngeal swabs were  
169 screened for influenza A and B, RSV, and, since March 2020, SARS-CoV-2, using discrete  
170 real-time RT-PCR assays (Supplementary Text S1). Only the SARI sentinel site of  
171 CENHOSOA supplied samples consistently across the entire study period, while most sites  
172 supplied samples intermittently for shorter durations throughout the 2011-2021 time series  
173 (Figure S1).

174

## 175 **Climate data**

176 Meteorological data reporting total precipitation (mm), mean relative humidity (%), and  
177 mean temperature ( $^{\circ}\text{C}$ ) at daily intervals in Antananarivo, Madagascar across the study period  
178 were downloaded from the National Aeronautics and Space Administration (NASA) database  
179 ([NASA](#)) and summarized by week (summed for precipitation and averaged for humidity and  
180 temperature).

181

## 182 **Data analysis**

### 183 *RSV infection correlates from generalized additive models (GAMs)*

184 We first aimed to identify correlates of RSV infection in patients reporting to study sites  
185 with ILI and SARI symptoms across the study period. To this end, we fit a series of Generalized  
186 Additive Models (GAMs) in the binomial family, incorporating a response variable of RSV  
187 infection outcome (0/1, indicating negative or positive) for all ILI and SARI patients tested in  
188 dataset across all reporting sites ([Wood 2001](#)). In the first GAM, we modeled all predictor  
189 variables as smoothing splines, with ‘day of year’ formatted as a cyclic cubic spline (to control  
190 for intra-annual seasonality in our dataset), ‘age’ formatted as a thinplate smoothing spline, and  
191 ‘sex’, ‘year’, and ‘reporting hospital’ formatted as factorial random effects (Table S1). We  
192 additionally fit a second GAM with ‘year’ formatted as a numeric thinplate smoothing spline  
193 to evaluate interannual patterns across the time series (Table S1). Finally, because age and sex  
194 data were only available for a subset (N=3242) of tested cases, we fit a third GAM in the  
195 binomial family to the full dataset of RSV test data (N=3432), incorporating only predictor  
196 variables of ‘day of year’ (as a cubic smoothing spline) and ‘year’ (as a random effect) (Table  
197 S1).

198

### 199 *Estimation of age-structured force of infection (FOI) for reported RSV cases in Antananarivo*

200 Building from age correlates of infection identified in GAMs, we next sought to quantify  
201 age-structured variation in the FOI for reported RSV cases across the study period. Methods for

202 estimating FOI from age-stratified serological data for single-strain immunizing pathogens are  
203 well-established (Muench 1959, Heisey *et al.* 2006, Long *et al.* 2010, Pomeroy *et al.* 2015), and  
204 prior work has successfully adapted them for application to age-structured incidence data, in  
205 lieu of serology (Grenfell *et al.* 1985). Assuming individuals are born susceptible and immunity  
206 following infection is lifelong, the standard ‘catalytic’ model describes the cumulative  
207 probability ( $P(a)$ ) of encountering infection by age  $a$  as:

$$P(a) = 1 - e^{-\int_0^a \lambda(a) da}$$

[1]

210 where  $\lambda(a)$  is the age-specific force of infection.

211 Following equation [1], we fit a series of catalytic models with variable number and  
212 duration of age classes to the cumulative incidence of reported cases of RSV by age in  
213 Antananarivo across the study period, then compared model fit to the data by AIC to evaluate  
214 the most appropriate number and distribution of age classes by which to segregate FOI (Table  
215 S2). We first evaluated a null model assuming a single constant FOI across all age classes, then  
216 tested increasingly complex models that specified disparate piece-wise constant values for  $\lambda(a)$   
217 across age brackets (27 models tested in total; Table S2). We focused estimation of  
218 heterogeneity in  $\lambda(a)$  on young and old patients presumed to be at heightened risk for RSV  
219 infection. Only models that achieved convergence in the fitting process were evaluated. All  
220 models were fit using a quasi-Newton (L-BFGS-B) optimization method in the ‘optim’ function  
221 of the base R (v 4.2.2) package ‘stats’; 95% confidence intervals on the resulting age-specific  
222 FOI estimates were constructed from the hessian matrix.

223  
224 *Seasonal transmission dynamics of RSV via time series Susceptible-Infected-Recovered (TSIR)*  
225 *modeling*

226 We next sought to quantify the seasonality of RSV transmission across our study period,  
227 using a time series Susceptible-Infected-Recovered (TSIR) modeling approach implemented in  
228 the R package, tsiR (Finkenstädt *et al.* 2000, Bjørnstad *et al.* 2002, Grenfell *et al.* 2002, Becker  
229 *et al.* 2017). One of the most widely-used classes of the general SIR model, the TSIR model  
230 was originally developed to simplify the process of parameter estimation in fitting SIR models  
231 to time series data for measles, a perfectly immunizing, widespread childhood disease  
232 (Finkenstädt *et al.* 2000, Bjørnstad *et al.* 2002, Grenfell *et al.* 2002). More recently, TSIR has  
233 been adopted for application to other immunizing childhood diseases, including varicella  
234 (Baker *et al.* 2018), rubella (Metcalf *et al.* 2011, Wesolowski *et al.* 2016), and RSV (Baker *et*

235 *al. 2019, Wambua et al. 2022*). TSIR depends on two critical assumptions, requiring (i), that  
236 over long time horizons, the sum of infected cases should be equivalent to the sum of births for  
237 highly infectious childhood diseases (for which all individuals are assumed to be eventually  
238 exposed), and (ii), that the infectious period of the pathogen modeled is equal to the sampling  
239 interval for the time series data. TSIR thus captures epidemic dynamics in a series of simple  
240 difference equations, whereby the susceptible population in a future timestep ( $S_{t+1}$ ) can be  
241 modeled as:

$$242$$
$$243 \quad S_{t+1} = S_t + B_t - I_t - \mu_t \quad [2]$$
$$244$$

245 where  $B_t$  corresponds to birth inputs to the population in each timestep,  $I_t$  indicates susceptibles  
246 lost to infection,  $\mu_t$  is additive noise, and  $S_t$  can be rewritten as  $S_t = \bar{S} + Z_t$  where  $\bar{S}$  is the  
247 mean number of susceptibles in the population and  $Z_t$  describes the (unknown) time-varying  
248 deviations around this mean. From this, the susceptible population can be reconstructed  
249 iteratively across a time series, after rewriting equation [2] in terms of  $Z_t$  and the starting  
250 condition,  $Z_0$ :

$$251$$
$$252 \quad \sum_{k=0}^{t-1} B_k = -Z_0 + \frac{\sum_{k=0}^{t-1} I r_k}{\rho} + Z_t + \mu_t \quad [3]$$
$$253$$

254 Equation [3] assumes that  $\rho$  is the reporting rate of infection and  $I r_k$  is the reported incidence  
255 (in our case corresponding to reported cases of RSV in our study region). Because TSIR  
256 assumes no overlapping infection generations, the number of infections per timestep can then  
257 be expressed as the product of the susceptible and infected populations in the preceding  
258 generation, along with the time-varying transmission rate ( $\beta_t$ ):

$$259$$
$$260 \quad I_{t+1} = \frac{\beta_{t+1} S_t I_t^\alpha}{N_t} \quad [4]$$
$$261$$

262 where the homogeneity parameter ( $\alpha$ ) corrects for epidemic saturation in the process of  
263 discretizing a continuous epidemic. Equation [4] can then be easily log-linearized as:

$$264$$
$$265 \quad \ln I_{t+1} = \ln \beta_{t+1} + \ln(Z_t + \bar{S}) + \alpha \ln I_t - \ln N_t \quad [5]$$
$$266$$

267 allowing for estimation of  $\beta_t$  via simple regression techniques.



268 From above, we first followed (Baker *et al.* 2019) to reconstruct the population  
269 susceptible to RSV in our catchment area in Antananarivo, Madagascar. To this end, we binned  
270 RSV positive cases by week across the time series for all reporting sites, and correspondingly  
271 summed the population catchments for each site over each week for which data were reported  
272 (e.g. the population modeled was higher for timesteps reporting cases from a greater number of  
273 sites). To avoid errors in TSIR, we substituted a value of 1 for weeks reporting zero cases. We  
274 estimated weekly total births for our study population across the time series by multiplying per  
275 capita publicly available birth rates for Madagascar reported by the World Bank (Bank 2023)  
276 against the summed population size of the catchment of all reporting study sites, divided evenly  
277 across weekly timesteps in a given year (per capita World Bank birth rates are reported as  
278 annual means only). Again following (Baker *et al.* 2019), we reconstructed the susceptible  
279 population using a simple linear regression of cumulative cases against cumulative births (Table  
280 S3). We validated our susceptible reconstruction by comparing the coarse estimate of the basic  
281 reproduction number ( $R_0$ ) for RSV in Antananarivo that can be derived from the relationship  
282  $\bar{S} = 1/R_0$  (Wesolowski *et al.* 2016, Becker *et al.* 2017) with that inferred from the mean birth  
283 rate and average age of infection across the time series, assuming  $R_0 = G/A$  where  $G$  is the  
284 inverse of the population birth rate and  $A$  is the average age of infection (Rm 1991).

285 Finally, following susceptible reconstruction, we implemented a log-link linear  
286 regression in the ‘Poisson’ family in the tsiR package to estimate the weekly RSV transmission  
287 rate ( $\beta$ ). Though we modeled our data in 52 weekly timesteps per year, to avoid overfitting, we  
288 constrained our fitting to 26 distinct biweekly transmission rates across the 11-year dataset (e.g.  
289 transmission was held constant between consecutive two-week intervals; Table S3). Consistent  
290 with prior studies (Glass *et al.* 2003, Baker *et al.* 2019), we fixed the homogeneity parameter  
291 ( $\alpha$ ) at 0.97 in the fitting process; previous work has demonstrated that inference into seasonal  
292 transmission rates from TSIR is robust to the value of  $\alpha$  (Metcalf *et al.* 2009).

293

#### 294 *Climatic drivers of RSV transmission using generalized linear models (GLMs)*

295 Following estimation of seasonal transmission rates for RSV in Antananarivo, we  
296 sought to quantify the impact of local climate variables on RSV transmission across the time  
297 series. Here, we used a generalized linear model (GLM) in the ‘gaussian family’, fit to the  
298 response variable of the natural log of the weekly RSV transmission rate, as estimated from  
299 TSIR, with fixed predictor variables of total weekly precipitation (mm), weekly mean relative  
300 humidity (%), and mean weekly temperature ( $^{\circ}\text{C}$ ) for Antananarivo across the study period. Our  
301 most comprehensive, global GLM thus took the following general form:

302 
$$\ln(\text{Em}(\beta_t)) = b_1 P_t + b_2 \left( \frac{1}{H_t} \right) + b_3 T_t$$

303 [6]

304 where  $\text{Em}(\beta_t)$  corresponds to the empirically estimated transmission rate from TSIR, and  $P_t$ ,  
305  $H_t$ , and  $T_t$  correspond respectively to total weekly precipitation, mean weekly relative humidity,  
306 and mean weekly temperature at time  $t$ . Using the ‘dredge’ function in the R package MuMIn  
307 (Barton *et al.* 2015), we then conducted model selection by comparing the relative AICc of all  
308 predictor variable combinations of the global model defined in equation [6] (Table S4). We  
309 used the fitted correlation coefficients of the top-performing model from this selection exercise  
310 to explore the predicted impact of climatic variation on RSV transmission. Initially, we also  
311 considered GLMs exploring lagged interactions between climate variables and transmission  
312 response; however, likely because RSV is a directly-transmitted infection, these representations  
313 were not well-supported by the data, and we eventually disregarded this approach.

314

#### 315 *Interannual trends in Antananarivo climate variables and RSV case counts from GAMs*

316 Finally, we aimed to quantify interannual trends for all Antananarivo climate variables  
317 considered across the 2011-2021 time series, while controlling for intra-annual seasonal  
318 variation. To this end, we fit three separate climate GAMs in the ‘gaussian’ family to the  
319 response variables of, respectively, total weekly precipitation (mm), mean weekly relative  
320 humidity (%), and mean weekly temperature ( $^{\circ}\text{C}$ ) for Antananarivo. Each GAM incorporated a  
321 fixed, numerical effect of ‘year’ and cubic smoothing spline of ‘day of year’ (Table S5). We  
322 additionally fit a fourth GAM in the ‘Poisson’ family, which took the same form as the climate  
323 GAMs but included a response variable of total weekly reported RSV cases across the time  
324 series (Table S5). Subsequently, we restructured all four GAMs with ‘year’ input as a  
325 smoothing spline and formatted as factorial, random effect to identify any deviant years in the  
326 overall climate or case time series (Table S5).

327

## 328 **RESULTS**

### 329 **Correlates of RSV infection by GAMs**

330 From January 2011 to December 2021, a total of 3432 samples from reporting sites were  
331 screened for RSV. Of these, 989 (28.80%) tested positive for RSV infection (Fig. S1). RSV  
332 prevalence varied considerably across the weekly time series, consistent with irregular reporting  
333 and seasonality (Fig. 1A).

334 We first investigated correlates of RSV positivity using GAMs fit to 3242 datapoints  
335 for which all possible metadata variables were reported. Our first GAM, in which we modeled  
336 year as a factorial random effect performed slightly better than the second GAM modeling year  
337 as a numerical variable (Table S1); thus, we report the results of the best fit model only here.  
338 In this best fit GAM, we identified a significant effect of day of year, year, age, and reporting  
339 sites on RSV positivity; no significant association was identified for sex (Fig. 1; Table S1). In  
340 general, days 9-113 of each year (early January through the late April) were significantly  
341 positively associated with RSV infection, consistent with records of the peak epidemic season  
342 for RSV in Madagascar (Fig. 1B). This relationship turned negative for the rest of the year, with  
343 a slight uptick at the end of December, as the onset of a new epidemic season approached. A  
344 few discrete years in the time series demonstrated significant deviations in reported RSV  
345 prevalence across the time series: years 2012 and 2013 were significantly positively associated  
346 with RSV infection, while year 2015 was negatively associated with RSV infection. Patient  
347 ages  $\leq 2$  years were additionally positively associated with RSV infection. Most other ages were  
348 negatively associated with RSV infection, though no significant directionality in association  
349 was identified in patient ages  $>85$  years (Fig. 1D). The reporting hospital of CENHOSOA was  
350 also positively associated with RSV infection (Fig. 1F), likely a result of the overwhelming  
351 predominance of samples received from this locality. Day of year and annual patterns were  
352 largely recapitulated when modeling (in a third GAM) the entire dataset of 3432 samples  
353 without including age, sex, and reporting hospital as predictors: in this model, days of year 7-  
354 111 were significantly positively associated with RSV infection, as were discrete years 2012,  
355 2013, and 2019. As in the first GAM, year 2015 was also significantly negatively associated  
356 with RSV positivity (Table S1).

357

### 358 **Estimation of the age-structured FOI for RSV cases**

359 Of the catalytic models tested, a model incorporating a piecewise, age-specific FOI  
360 across nine discrete age bins (with respective lower bounds of 0, 0.5, 1, 2, 3, 4, 25, 60, and 70  
361 years) offered the best fit to the data (Table S2). Within this model framework, we estimated  
362 the highest FOIs in the two youngest cohorts (FOI = 1.03 [0.92-1.13] for ages 0 to  $<0.5$  years;  
363 FOI = 1.50 [1.27-1.73] for ages 0.5 to  $<1$  year) (Fig. 2). From this peak, FOI then decreased  
364 with increasing age across the first four years of life and sank to near-zero between ages 4 – 60  
365 years (Fig. 2). FOI increased again in individuals aged 60 to  $<70$  years (0.11 [0.05-0.16]) and  
366 individuals 70+ years in age (0.34 [0.15-0.51]). In general, we found improved model fit to the  
367 data when incorporating heightened specificity in  $\lambda(a)$  for CU5, as well as in individuals  $>60$

368 years in age. Additional complexity in modeled age structure in older adolescents or young-  
369 and middle-aged adults did little to improve model performance (Table S2). Consistent with  
370 the literature, these patterns suggest that the highest hazard of RSV infection is concentrated in  
371 the youngest and, to a lesser extent, oldest populations in Antananarivo.

372

### 373 **Seasonality of RSV transmission by TSIR modeling**

374 We next binned reported RSV cases into weekly intervals across our time series for  
375 TSIR modeling. Consistent with results from the binomial GAMs, we observed from the raw  
376 data that weekly cases were highest in the first third of each year (January – April), excepting  
377 the year 2012, for which the epidemic peak was observed between May and August (Fig. 3A).  
378 Our efforts to reconstruct the population susceptible to RSV from publicly available birth rate  
379 data indicated significant underreporting of RSV across the time series, with a mean estimated  
380 reporting rate of only 2.9% (Fig. S2A-D). Nonetheless, the regression of cumulative reported  
381 cases against cumulative births was well-supported ( $R^2= 0.98$ ; Table S3) and produced a  
382 plausible estimate for the mean susceptible population of roughly 20% (Fig. S2D). This quantity  
383 corresponds to an estimated  $R_0 = 5$  for RSV in our Antananarivo catchment area; coarse  
384 estimation of  $R_0$  using the inverse of the mean per capita birth rate (0.0327) and average age of  
385 infection (6.67) across the time series yields a comparable estimate of  $R_0 = 4.58$ . Literature  
386 reported  $R_0$  values for RSV range from 1–9, with 3 as the most commonly-cited statistic ([Weber](#)  
387 [et al. 2001](#), [White et al. 2007](#), [Pitzer et al. 2015](#), [Reis et al. 2016](#), [Reis et al. 2018](#)). Though our  
388 estimates are in the upper half of this range,  $R_0 = 4.5–5$  for RSV is not illogical given high birth  
389 rates and densely aggregated populations in Antananarivo.

390 Consistent with prior patterns observed in the GAMs (Fig. 1) and in the raw data (Fig.  
391 3A), our fitted TSIR model estimated that RSV transmission peaked in January–February,  
392 slightly preceding cases, then declined throughout the rest of the year before climbing again in  
393 December (Fig. 3B; Fig S2E). As with susceptible reconstruction, our log-link linear regression  
394 to estimate transmission was well supported (McFadden pseudo- $R^2= 0.64$ ; Table S3) and  
395 successfully reconstructed the time series of cases following simulation (Fig. S2F-G).

396

### 397 **Climate predictors of seasonal RSV transmission by GLMs**

398 From the Antananarivo raw climate data, we observed that annual precipitation largely  
399 mirrored the seasonality of RSV, with most of the rainfall concentrated between January and  
400 the end of April and a slight increase in November and December leading up to the onset of  
401 each new year (Fig. 3C). Relative humidity also peaked in the early half of the year but remained

402 high through June, with lows concentrated between September and November (Fig. 3D). Mean  
403 temperature followed the same broad pattern as the other climate variables but with a more  
404 gradual, sinusoidal annual cycle, with highs concentrated in the summer between November –  
405 March and lows between June – August (Fig. 3E).

406 Our top performing GLM to evaluate the strength of association between climate and  
407 RSV transmission (as estimated from TSIR) included all three weekly Antananarivo climate  
408 variables (precipitation, humidity, and temperature) as significant correlates of transmission,  
409 with precipitation contributing the most to the total deviance explained by the model ( $R^2=0.10$ ;  
410 Fig. 4A-B; Table S4). The second-best performing model included only precipitation and  
411 humidity as significant correlates of RSV transmission, again with a more pronounced effect  
412 for precipitation. In all cases, precipitation demonstrated a highly significant, positive  
413 correlation with the weekly RSV transmission rate ( $p<0.001^{***}$ ; Fig. 4B-C; Table S4). By  
414 contrast, relative humidity was significantly negatively associated with RSV transmission  
415 ( $p<0.01^*$ ; Fig. 4B-C; Table S4). Mean weekly temperature was positively correlated with  
416 transmission, but the association was considerably weaker than that observed for precipitation  
417 and only marginally significant ( $p<0.1^*$ ; Fig. 4B-C; Table S4).

418

#### 419 **Interannual trends for climate variables and RSV cases by GAMs**

420 GAMs fit to the 2011-2021 time series for all three Antananarivo climate variables  
421 demonstrated a significant, positive interannual trend in all cases, suggesting that precipitation,  
422 humidity, and temperature have all increased across the past decade (precipitation:  $p=0.05^*$ ;  
423 humidity:  $p=0.07^*$ ; temperature:  $p=0.004^{**}$ ; Fig. S3 A-C; Table S5). Intra-annual trends  
424 captured in GAMs mimicked those previously described from observations of the raw data,  
425 with precipitation peaking at the beginning and end of each calendar year, relative humidity  
426 offset but still at its highest in the early half of the year, and temperature more evenly distributed  
427 with highs concentrated between November – March and lows from June – August (Fig. S3A-  
428 C; Fig. 3C-E). In contrast to climate patterns, a Poisson GAM fit to the weekly time series of  
429 case counts demonstrated no significant interannual trend ( $p>0.1$ ; Fig S3D; Table S5), after  
430 controlling for intra-annual cycling. Climate GAMs considering year as a factorial random  
431 effect indicated that year 2020 experienced significantly higher precipitation and humidity than  
432 average, while 2019 was found to be significantly warmer (Fig. S3); by contrast, year 2011 was  
433 found to have lower-than-average humidity and years 2013 and 2016 to be significantly cooler  
434 than average (Fig. S3). We identified no correspondence between those years exhibiting  
435 anomalous climate behavior and those previously identified to have a higher-than-average RSV

436 burden (2012 and 2013); RSV deviations already explored in Fig. 1 were largely confirmed by  
437 the Poisson GAM tested here (Fig. S3).

438

## 439 **DISCUSSION**

440 In this study, we used a suite of modeling approaches to (1) characterize correlates for  
441 reported RSV infections, (2) quantify age-structure in the force of RSV infection, (3) document  
442 seasonality in RSV transmission, and (4) identify possible climatic drivers of this seasonality  
443 in the low income setting of Antananarivo, Madagascar.

444 The results of our analysis of correlates of RSV transmission are consistent with those  
445 previously documented for this disease, both in Madagascar and elsewhere ([Hall \*et al.\* 2013](#),  
446 [Razanajatovo \*et al.\* 2018](#), [Razanajatovo \*et al.\* 2022](#)): we find that reported hospitalizations for  
447 RSV are largely concentrated in very young patients ( $\leq 2$  years of age) with a potential weaker  
448 association in elderly individuals ( $>60$  years of age). Our quantification of the age-structured  
449 FOI for RSV indicates that the most intense transmission is focused in infants aged less than  
450 one year, with transmission intensity steadily decreasing to near-zero after four years of age,  
451 before rising again in elderly cohorts. Because we fit our FOI models to reported cases only, it  
452 is possible that less pathogenic RSV transmission may dominate among older children,  
453 resulting in asymptomatic infections, as has been previously suggested in the analysis of age-  
454 structured *serological* data from other regions ([Nakajo \*et al.\* 2023](#)). Our crude estimates for  
455 RSV  $R_0$ , which we computed from the average age of infection and mean population-level birth  
456 rate, as well as from the mean susceptible population estimated from TSIR, additionally suggest  
457 that RSV transmission is elevated in Antananarivo, as compared with global averages ([Weber  
458 \*et al.\* 2001](#), [White \*et al.\* 2007](#), [Pitzer \*et al.\* 2015](#), [Reis \*et al.\* 2016](#), [Reis \*et al.\* 2018](#)). Again, our  
459 reliance on reported cases likely upwardly biases these calculations by overrepresenting more  
460 pathogenic strains or more vulnerable populations or both. Nonetheless, these estimates fall  
461 well within reported ranges for RSV  $R_0$  ([Weber \*et al.\* 2001](#), [White \*et al.\* 2007](#), [Pitzer \*et al.\* 2015](#),  
462 [Reis \*et al.\* 2016](#), [Reis \*et al.\* 2018](#)), and a slightly elevated RSV transmission rate is not illogical,  
463 given Antananarivo's young and densely aggregated population.

464 In addition to describing the magnitude and age-structure of RSV transmission, our  
465 study also successfully quantifies intra-annual seasonality in RSV dynamics in Antananarivo.  
466 A seasonal concentration of RSV burden in the first half of the calendar year in Madagascar  
467 has been previously suggested based on more qualitative examination of the raw case data  
468 ([Rabarison \*et al.\* 2019](#), [Razanajatovo \*et al.\* 2022](#)); however, our study is the first to actually  
469 quantify RSV transmission, which slightly precedes cases. Our investigation of climatic

470 correlates of the weekly transmission rate echoes recent work from the northern hemisphere  
471 which highlights a significant positive role for precipitation and negative role for humidity in  
472 driving RSV transmission dynamics (Baker *et al.* 2019). In addition, we identify a significant  
473 (though weaker) positive correlation between RSV transmission and temperature in  
474 Antananarivo. Because high temperatures and high precipitation are themselves correlated in  
475 tropical Madagascar’s rainy season, which spans October – March, it is possible that this muted  
476 contribution of temperature to RSV transmission dynamics may simply be an artifact of the  
477 precipitation driver, rather than a causative association of its own. Our examination of  
478 interannual trends in the climate data suggests that precipitation, humidity, and temperature  
479 have all increased across the past decade study period in Antananarivo, but that average RSV  
480 caseload has remained constant. As high precipitation is associated with elevated RSV  
481 transmission rates, but high humidity is associated with lower RSV transmission rates in our  
482 dataset, it is possible that these climate drivers have had largely neutralizing effects on the  
483 overall RSV burden throughout our time series. Nonetheless, our statistical models demonstrate  
484 a more pronounced effect of precipitation on the overall variation in observed RSV  
485 transmission, as has been reported in other tropical locations that demonstrate high average  
486 annual humidity with minimal variation across the year (Baker *et al.* 2019). Though there is no  
487 animal model available for RSV, experimental work in influenza has demonstrated that low  
488 humidity conditions favor transmission between guinea pigs, as a result of either increased  
489 survival of the virus and/or extended duration of virus circulation in aerosols in drier conditions  
490 (Lowen *et al.* 2007). Future climate impacts on RSV transmission are likely to depend on the  
491 relative slope of each climate driver’s projected increase in a specific locality: over the past  
492 decade, precipitation has increased at a faster rate than humidity in tropical Antananarivo. If  
493 current trends hold, higher precipitation could drive future RSV transmission beyond the  
494 tempering effects of humidity.

495 Finally, our analysis highlights a few years in our decade-long time series that vary  
496 significantly from the overall trend, with higher- or lower-than-average RSV-attributed  
497 infections and, in one year (2012), an irregular, off-season peak. Prior work in other systems  
498 has described off-season RSV epidemics attributed to irregular climate patterns (De Silva *et al.*  
499 1986), but we were unable to identify any association between deviant years in the RSV time  
500 series in Antananarivo and any observed climatic anomalies. Higher- or lower-than average  
501 RSV burden in a given year could instead reflect the complex interplay between host immunity  
502 and circulating viral genotypes—both those of RSV itself, for which two major subtypes are  
503 known (Peret *et al.* 1998), and those of other respiratory infections known to induce some

504 degree of anti-RSV cross-protective immunity (Bhattacharyya *et al.* 2015). Prior sequencing  
505 efforts of Antananarivo RSV cases over the same time period indicate that year 2012 witnessed  
506 a transition in caseload from the previously dominant RSV subtype B to RSV subtype A –  
507 genotype NA1, which was subsequently replaced by the introduction of the novel RSV subtype  
508 A – genotype ON1 in 2014 (Eshaghi *et al.* 2012, Razanajatovo Rahombanjanahary *et al.* 2020)).  
509 It is possible that the irregular seasonality of the RSV epidemic of 2012 reflects a lack of prior  
510 immunity in the Antananarivo CU5 population to RSV subtype B prior to turnover—though  
511 this hypothesis is impossible to test in the absence of additional viral genomic sequencing and  
512 paired subtype-specific serology. Off-season RSV transmission was well-documented globally  
513 in 2020 and 2021 following relaxation of non-pharmaceutical interventions (NPIs)  
514 implemented to counter the initial spread of SARS-CoV-2 (Eden *et al.* 2022). Intriguingly, our  
515 analysis did not recover any signature of aberrant RSV transmission for the year 2020 or 2021  
516 in Antananarivo, suggesting that NPIs were largely unsuccessful at reducing respiratory virus  
517 transmission in this region during this time (Razanajatovo *et al.* 2022). Indeed, broadscale  
518 serosurveys in 2020 and 2021 suggest that over 40% of the Antananarivo population was  
519 exposed to SARS-CoV-2 within the first six months of the pandemic (Razafimahatratra *et al.*  
520 2021), underscoring the relative ineffectiveness of NPIs on reducing respiratory disease burden.

521 Our study is limited by its focus to only a few reporting sites in Antananarivo, with most  
522 samples received from one sentinel site (CENHOSOA). This restricted geography somewhat  
523 impedes our ability to draw conclusions about broad trends in RSV dynamics across  
524 Madagascar. In addition, our FOI estimation is limited by the necessarily arbitrary segregation  
525 of the population into discrete age classes; while we attempted to consider all plausibly relevant  
526 delineations of age with respect to transmission, it is possible that we may have overlooked  
527 important dynamics hidden in untested hypotheses. In addition, we were challenged by  
528 uncertainty in estimates of the population served by the catchment area of focal sites, which  
529 subsequently undermines downstream estimation of local birth rates and corresponding  
530 susceptible population reconstruction for input into TSIR. As a frequent limitation of TSIR  
531 approaches, we were forced to extrapolate weekly birth rate data for our study population using  
532 very broad national-level, annual birth rate estimates from the World Bank. More fine scale  
533 birth data specifically tailored to our study region would do much to improve inference into  
534 infection dynamics. Our climate records, which draw from Antananarivo at large, are similarly  
535 broad, given the highly localized (e.g. within-household) nature of the majority of RSV  
536 transmission (Hall *et al.* 1976, Munywoki *et al.* 2014). Finally, as mentioned, our dataset was  
537 limited to reported RSV cases only. More widespread prospective sampling of less virulent



538 disease manifestations – either through molecular testing, or more feasibly, serology – would  
539 greatly enhance our inference into RSV transmission. In addition, investigation of genome  
540 sequences would enable us to test hypotheses about the impact of virus genotype diversity on  
541 asynchronous and off-season dynamics. Despite these challenges, our modeling efforts recover  
542 plausible estimates for both the seasonality and  $R_0$  of reported cases of RSV in Antananarivo,  
543 suggesting that these uncertainties did not seriously impact our results.

544 All told, our study underscores the heavy morbidity and mortality burden that RSV  
545 presents to young children in Antananarivo and highlights an important role for climate in  
546 driving seasonal epidemics. Future changes in climatic parameters, particularly precipitation,  
547 are likely to impact RSV dynamics and may impact transmission, at least in the short-term, in  
548 Madagascar. Introductions of new intervention strategies are greatly needed to mitigate RSV's  
549 heavy mortality burden in LMICs—especially considering possible intensification of burden in  
550 response to climate. RSV vaccines for older patients and pregnant mothers, as well as  
551 monoclonal antibody treatment for neonates, have recently become available in high income  
552 countries ([Langedijk \*et al.\* 2023](#)). Despite projections of positive impact ([Brand \*et al.\* 2020](#)),  
553 these interventions have not yet reached the Global South, largely as a result of high cost  
554 barriers and lack of awareness of regional health authorities and communities regarding the  
555 burden of RSV. Shortages of human, financial, and material resources, which jeopardize the  
556 provisioning of quality health services, are still a serious challenge in LMICs. Equitable global  
557 distribution of these interventions needs to be a major public health priority for the next decade.

558  
559

560 **FIGURES**

561 **Figure 1. GAM correlates of RSV positivity from influenza surveillance network testing**  
 562 **in Antananarivo, Madagascar (2011-2021).** (A) Time series of weekly RSV prevalence,  
 563 where point size corresponds to the number of samples tested (total 3432) from January 2011  
 564 – December 2021. For GAM fitted to data with all available correlates (3242, partial effect sizes  
 565 are shown for (B) day of year, (C) year, (D) age, (E) sex, and (F) sampling locality on the  
 566 probability of a sample testing positive for RSV infection. All predictors except sex contributed  
 567 significantly to overall model performance. Shading corresponds to 95% confidence intervals  
 568 (CI) by standard error. An effect is shaded in gray if the 95% CI crosses zero across the entire  
 569 range of the predictor variable; in contrast, an effect is shaded in blue and considered  
 570 “significant” if the 95% CI does not cross zero. Metrics from GAM fits are reported in Table  
 571 S1.

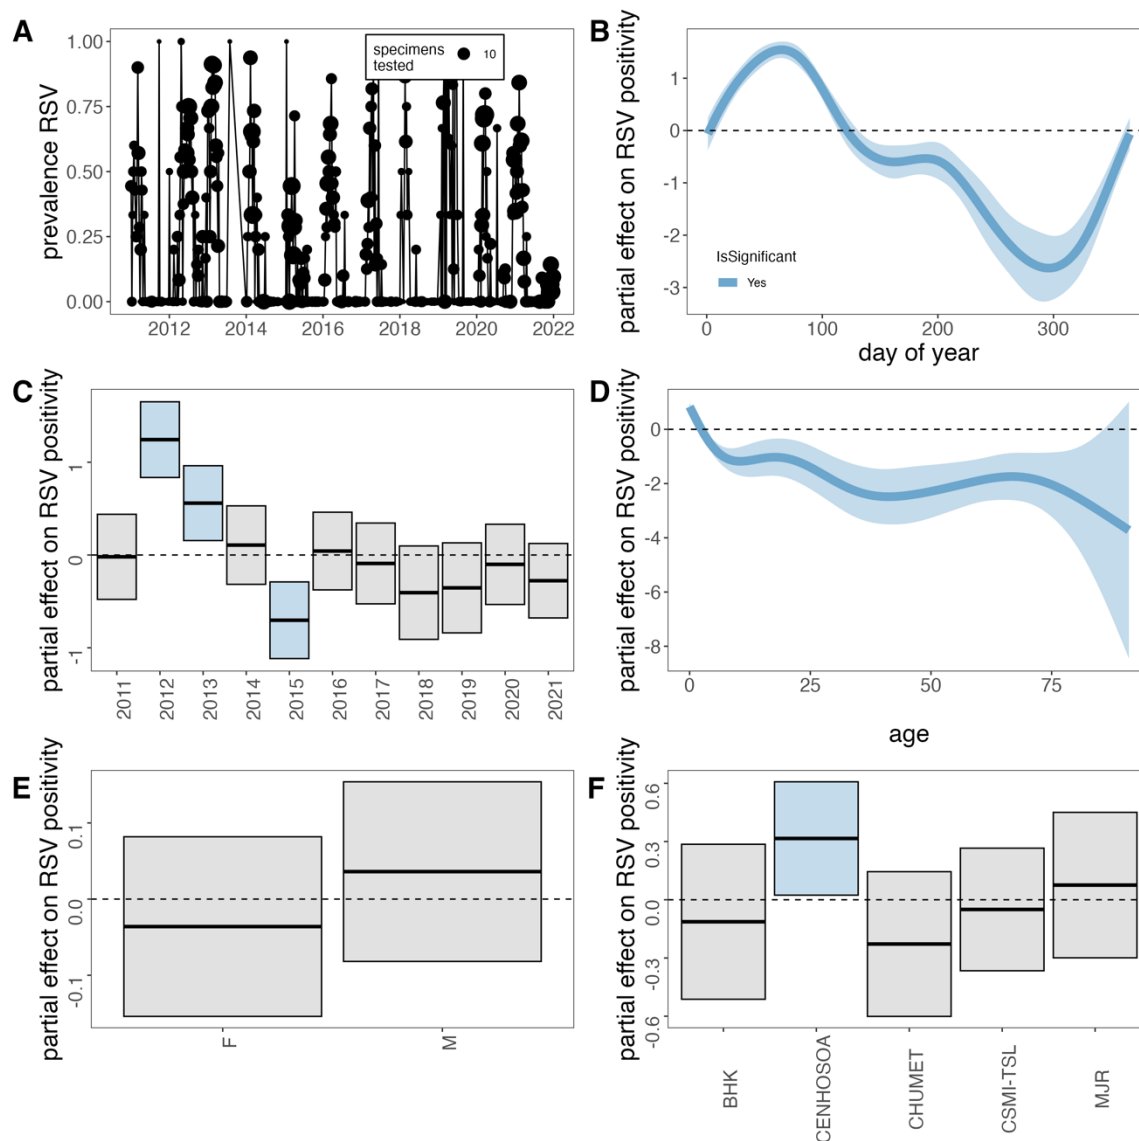

572

573 **Figure 2. Catalytic model estimation of age-structured force of infection for RSV**  
574 **hospitalizations.** (A) Cumulative proportion of hospitalized cases by age, across 2011-2021  
575 study period from all focal hospitals in Antananarivo (total = 3259 datapoints). Black dots and  
576 connecting black line correspond to raw data binned across annual age brackets, with the first  
577 year of life separated into two age brackets ( $<0.5$  years and  $\geq 0.5$  years). Red line corresponds  
578 to model output from best-fit FOI model, incorporating 9 piecewise constant, age-specific  
579 hazards of infection across discrete age classes, as shown in (B). In both panels, red shading  
580 corresponds to 95% CI on FOI estimates computed from the hessian matrix during model  
581 fitting; upper and lower CI bounds are used to project 95% CIs on modeled cumulative  
582 incidence in panel A. Comparisons of all models tested and exact FOI estimates from best-fit  
583 model are reported in Table S2.  
584

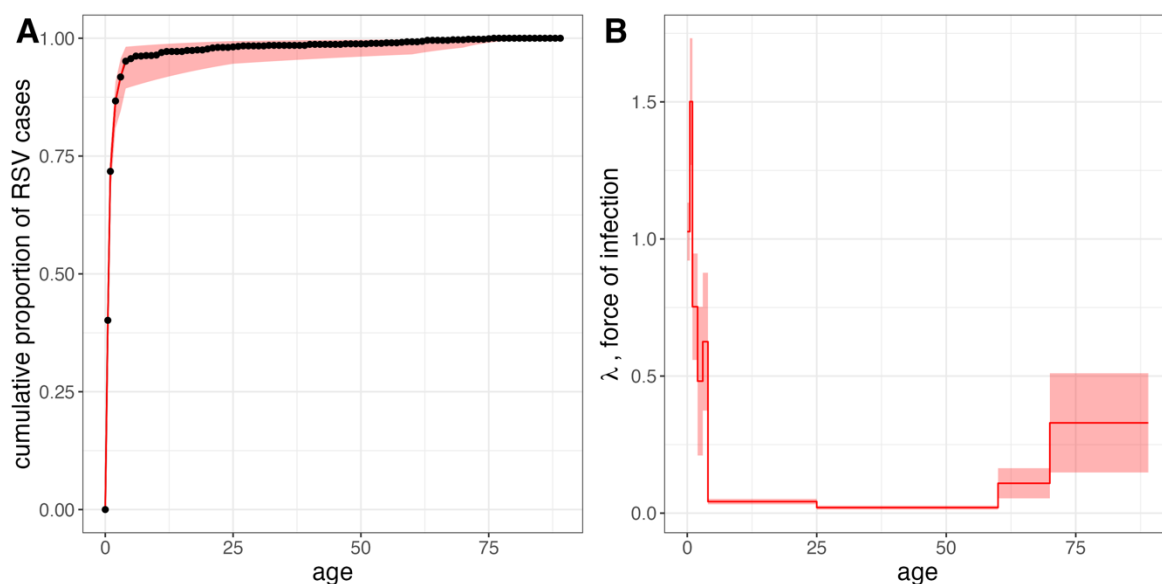

585  
586  
587  
588  
589  
590  
591  
592  
593  
594  
595  
596

597 **Figure 3. Seasonal trends in RSV infection and climate variables for Antananarivo,**  
598 **Madagascar (2011 – 2021).** (A) Weekly total RSV cases across all reporting hospitals in our  
599 catchment area, from January 2011 – December 2021, colored by year of reporting as indicated  
600 in legend. (B) Weekly RSV transmission rate, as estimated from TSIR model fitting across the  
601 year; shading corresponds to 95% confidence intervals by standard error from GLM fit. Raw  
602 weekly climate data for (C) total precipitation (mm), (D) mean relative humidity (%), and (E)  
603 mean temperature ( $^{\circ}$ C) in Antananarivo across the time series, colored by year of reporting as  
604 indicated in panel A.

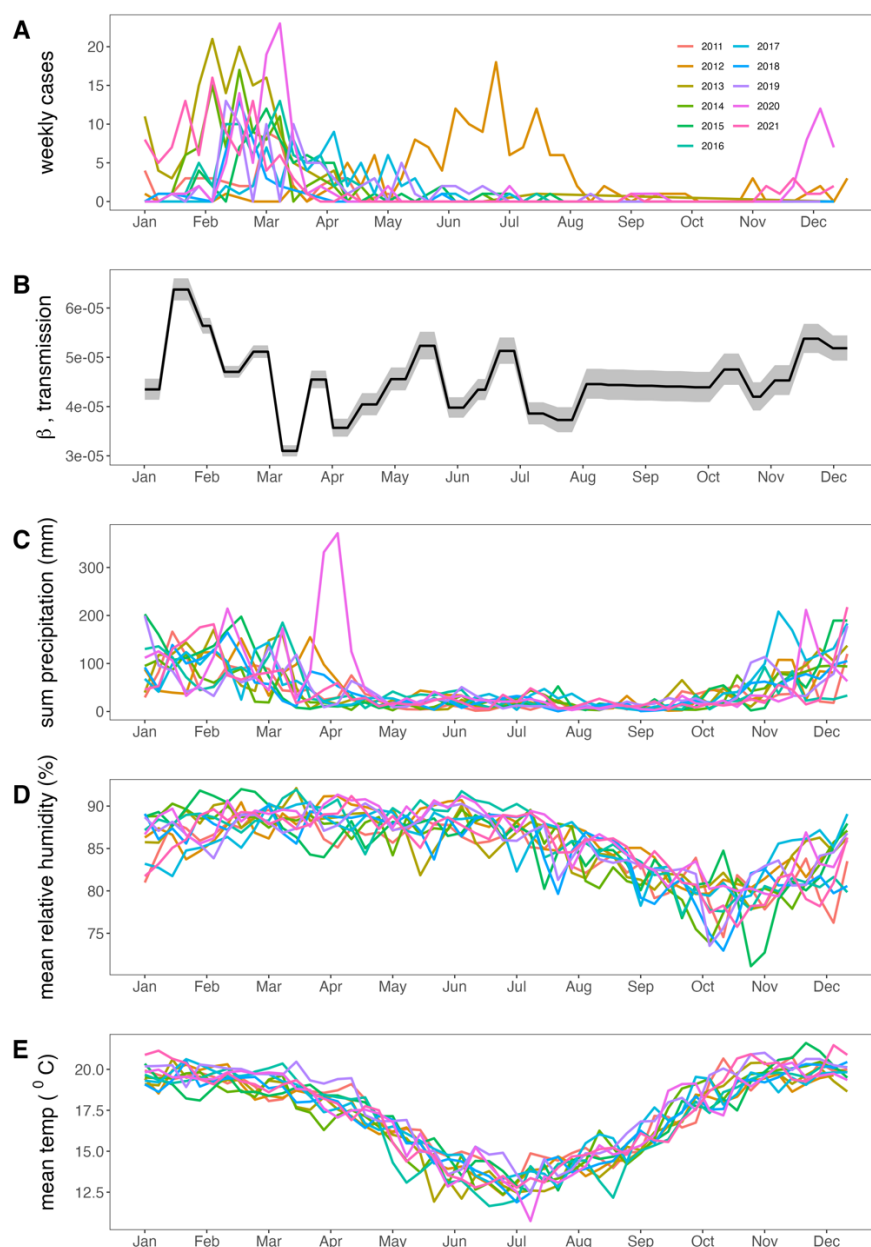

605  
606

607 **Figure 4. Climatic correlates of RSV transmission, from GLM analysis.** (A) Top 8 GLMs  
 608 using climate variables to predict RSV transmission from TSIR, ranked by  $\delta$ AICc. Rows  
 609 represent individual models, and columns represent predictor variables. Cells are shaded  
 610 according to the proportion of deviance explained by each predictor. Cells representing  
 611 predictor variables with a p-value significance level of  $<0.1$  are outlined in black; all others are  
 612 outlined in gray. (B) Effect size of significant climate correlates from best-fit GLM (top row in  
 613 panel A) on response variable of RSV transmission. 95% confidence intervals by standard error  
 614 are shown as horizontal bars and corresponding p-values are highlighted to the right for:  
 615 precipitation ( $p<0.001$ \*\*\*), humidity ( $p<0.05$ \*), and temperature ( $p<.1$ ). Statistical output is  
 616 reported in Table S4. (C) Predicted response of RSV transmission to a range of values for  
 617 significant climate correlates from best-fit GLM (top row in panel A); shading corresponds to  
 618 95% confidence intervals by standard error, computed for each effect size.

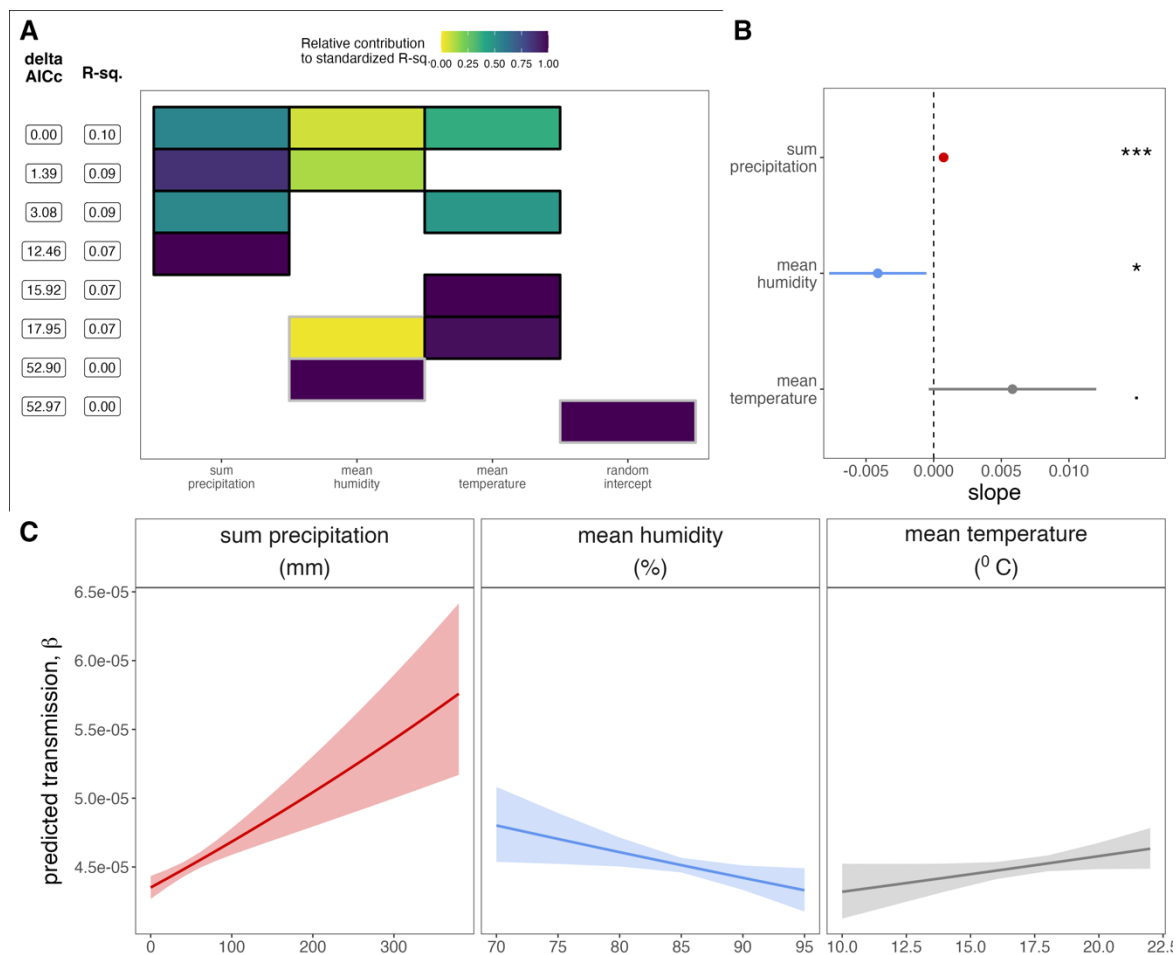

619  
 620  
 621  
 622  
 623

624 **ACKNOWLEDGEMENTS**

625 The authors thank all clinicians and nurses involved in the study, as well as staff involved in  
626 daily surveillance reporting of ILI and SARI cases at sentinel sites. The authors additionally  
627 thank the laboratory technicians at the Virology Unit of IPM and the Clinical and Medical  
628 Laboratory for their tremendous work in the molecular testing of the biological samples.

629

630 **CONTRIBUTORS**

631 CEB and JMH conceived the project and acquired the funding, in collaboration with NRS,  
632 and VL. Influenza and RSV Sentinel surveillance in Madagascar was coordinated by JMH,  
633 LR, NHR, and JHR. Sample collection was carried out by LR, JHR, and AR. All laboratory  
634 work, involving RNA extraction and subsequent PCR, was conducted by THR, NHR, and  
635 CR. CEB led the statistical analysis and FOI and TSIR modeling, with support from HCR and  
636 THR. THR and CEB co-wrote the original draft of the manuscript. All authors including  
637 DADR edited and approved the manuscript.

638

639 **FUNDING**

640 This research was supported by the US Centers for Disease Control and Prevention  
641 (Cooperative Agreement to JMH: NU51IP000812), the Bill and Melinda Gates Foundation  
642 (grant awards to CEB: OPP 1211841 and INV 049262), and the National Geographic Society  
643 Coding for Conservation program (grant award to CEB: 102825). The funders had no role in  
644 the study design, data collection or analysis, the decision to publish, or preparation of the  
645 manuscript.

646

647 **COMPETING INTERESTS STATEMENT**

648 The authors declare no competing interests.

649

650 **ETHICS APPROVAL**

651 This study was approved by the Ethics Committee of the Ministry of Health (MoH) of  
652 Madagascar (number: 96-MSANP/CERBM, dated August 27, 2018).

653

654

655 **DATA AVAILABILITY STATEMENT**

656 All raw data and statistical code for analysis are available in our open access GitHub repository:

657 <https://github.com/brooklabteam/RSV-madagascar>

658 **REFERENCES:**

- 659 1. Andeweg SP, Schepp RM, van de Kasstele J, Mollema L, Berbers GA and van Boven M  
660 (2021). Population-based serology reveals risk factors for RSV infection in children younger  
661 than 5 years. Scientific Reports **11**(1): 8953.  
662
- 663 2. Baker RE, Mahmud AS and Metcalf CJE (2018). Dynamic response of airborne infections  
664 to climate change: predictions for varicella. Climatic change **148**: 547-560.  
665
- 666 3. Baker RE, Mahmud AS, Wagner CE, Yang W, Pitzer VE, Viboud C, Vecchi GA, Metcalf  
667 CJE and Grenfell BT (2019). Epidemic dynamics of respiratory syncytial virus in current and  
668 future climates. Nature communications **10**(1): 5512.  
669
- 670 4. Bank TW (2023). The World Bank in Madagascar.  
671
- 672 5. Barton K and Barton MK (2015). Package ‘mumin’. Version **1**(18): 439.  
673
- 674 6. Becker AD and Grenfell BT (2017). tsiR: An R package for time-series Susceptible-  
675 Infected-Recovered models of epidemics. PLoS One **12**(9): e0185528.  
676
- 677 7. Bhattacharyya S, Gesteland PH, Korgenski K, Bjørnstad ON and Adler FR (2015). Cross-  
678 immunity between strains explains the dynamical pattern of paramyxoviruses. Proceedings of  
679 the National Academy of Sciences **112**(43): 13396-13400.  
680
- 681 8. Bjørnstad ON, Finkenstädt BF and Grenfell BT (2002). Dynamics of measles epidemics:  
682 estimating scaling of transmission rates using a time series SIR model. Ecological monographs  
683 **72**(2): 169-184.  
684
- 685 9. Brand SP, Munywoki P, Walumbe D, Keeling MJ and Nokes DJ (2020). Reducing  
686 respiratory syncytial virus (RSV) hospitalization in a lower-income country by vaccinating  
687 mothers-to-be and their households. Elife **9**: e47003.  
688
- 689 10. Chew FT, Doraisingham S, Kumarasinghe G, Lee BW and Ling AE (1998). Seasonal  
690 trends of viral respiratory tract infections in the tropics. Epidemiology and Infection **121**(1):  
691 121-128.  
692
- 693 11. Data OWi (2019). Causes of death in children under five, World, 2019.  
694
- 695 12. De Silva L and Hanlon M (1986). Respiratory syncytial virus: Report of a 5-year study at  
696 a children's hospital. Journal of medical virology **19**(4): 299-305.  
697
- 698 13. Desa U (2018). The 2018 Revision of World Urbanization Prospects. New York: UN  
699 DESA.  
700
- 701 14. Eden J-S, Sikazwe C, Xie R, Deng Y-M, Sullivan SG, Michie A, Levy A, Cutmore E,  
702 Blyth CC and Britton PN (2022). Off-season RSV epidemics in Australia after easing of  
703 COVID-19 restrictions. Nature communications **13**(1): 2884.  
704
- 705 15. Eshaghi A, Duvvuri VR, Lai R, Nadarajah JT, Li A, Patel SN, Low DE and Gubbay JB  
706 (2012). Genetic variability of human respiratory syncytial virus A strains circulating in Ontario:  
707 a novel genotype with a 72 nucleotide G gene duplication. PLoS One **7**(3): e32807.

- 708  
709 **16.** Falsey AR, Hennessey PA, Formica MA, Cox C and Walsh EE (2005). Respiratory  
710 syncytial virus infection in elderly and high-risk adults. New England Journal of Medicine  
711 **352**(17): 1749-1759.  
712  
713 **17.** Finkenstädt BF and Grenfell BT (2000). Time series modelling of childhood diseases: a  
714 dynamical systems approach. Journal of the Royal Statistical Society Series C: Applied  
715 Statistics **49**(2): 187-205.  
716  
717 **18.** Glass K, Xia Y and Grenfell BT (2003). Interpreting time-series analyses for continuous-  
718 time biological models—measles as a case study. Journal of theoretical biology **223**(1): 19-25.  
719  
720 **19.** Grenfell BT and Anderson R (1985). The estimation of age-related rates of infection from  
721 case notifications and serological data. Epidemiology & Infection **95**(2): 419-436.  
722  
723 **20.** Grenfell BT, Bjørnstad ON and Finkenstädt BF (2002). Dynamics of measles epidemics:  
724 scaling noise, determinism, and predictability with the TSIR model. Ecological monographs  
725 **72**(2): 185-202.  
726  
727 **21.** Haber N (2018). Respiratory syncytial virus infection in elderly adults. Med Mal Infect  
728 **48**(6): 377-382.  
729  
730 **22.** Hall CB, Geiman JM, Biggar R, Kotok DI, Hogan PM and Douglas Jr RG (1976).  
731 Respiratory syncytial virus infections within families. New England Journal of Medicine  
732 **294**(8): 414-419.  
733  
734 **23.** Hall CB, Weinberg GA, Blumkin AK, Edwards KM, Staat MA, Schultz AF, Poehling KA,  
735 Szilagyi PG, Griffin MR, Williams JV, Zhu Y, Grijalva CG, Prill MM and Iwane MK (2013).  
736 Respiratory syncytial virus-associated hospitalizations among children less than 24 months of  
737 age. Pediatrics **132**(2): e341-348.  
738  
739 **24.** Heisey DM, Joly DO and Messier F (2006). The fitting of general force-of-infection models  
740 to wildlife disease prevalence data. Ecology **87**(9): 2356-2365.  
741  
742 **25.** Heraud JM, Razanajatovo NH and Viboud C (2019). Global circulation of respiratory  
743 viruses: from local observations to global predictions. Lancet Glob Health **7**(8): e982-e983.  
744  
745 **26.** Hogan AB, Glass K, Moore HC and Anderssen RS (2016). Exploring the dynamics of  
746 respiratory syncytial virus (RSV) transmission in children. Theor Popul Biol **110**: 78-85.  
747  
748 **27.** Langedijk AC and Bont LJ (2023). Respiratory syncytial virus infection and novel  
749 interventions. Nature Reviews Microbiology **21**(11): 734-749.  
750  
751 **28.** Li Y, Wang X, Blau DM, Caballero MT, Feikin DR, Gill CJ, Madhi SA, Omer SB, Simões  
752 EAF, Campbell H, Pariente AB, Bardach D, Bassat Q, Casalegno JS, Chakhunashvili G,  
753 Crawford N, Danilenko D, Do LAH, Echavarria M, Gentile A, Gordon A, Heikkinen T, Huang  
754 QS, Jullien S, Krishnan A, Lopez EL, Markić J, Mira-Iglesias A, Moore HC, Moyes J,  
755 Mwananyanda L, Nokes DJ, Noordeen F, Obodai E, Palani N, Romero C, Salimi V, Satav A,  
756 Seo E, Shchomak Z, Singleton R, Stolyarov K, Stoszek SK, von Gottberg A, Wurzel D, Yoshida  
757 LM, Yung CF, Zar HJ and Nair H (2022). Global, regional, and national disease burden



- 758 estimates of acute lower respiratory infections due to respiratory syncytial virus in children  
759 younger than 5 years in 2019: a systematic analysis. Lancet **399**(10340): 2047-2064.  
760
- 761 **29.** Linssen RS, Bem RA, Kapitein B, Rengerink KO, Otten MH, den Hollander B, Bont L and  
762 van Woensel JBM (2021). Burden of respiratory syncytial virus bronchiolitis on the Dutch  
763 pediatric intensive care units. Eur J Pediatr **180**(10): 3141-3149.  
764
- 765 **30.** Long GH, Sinha D, Read AF, Pritt S, Kline B, Harvill ET, Hudson PJ and Bjørnstad ON  
766 (2010). Identifying the age cohort responsible for transmission in a natural outbreak of  
767 *Bordetella bronchiseptica*. PLoS Pathogens **6**(12): e1001224.  
768
- 769 **31.** Lowen AC, Mubareka S, Steel J and Palese P (2007). Influenza virus transmission is  
770 dependent on relative humidity and temperature. PLoS Pathogens **3**(10): e151.  
771
- 772 **32.** Mathisen M, Strand TA, Sharma BN, Chandyo RK, Valentiner-Branth P, Basnet S,  
773 Adhikari RK, Hvidsten D, Shrestha PS and Sommerfelt H (2009). RNA viruses in community-  
774 acquired childhood pneumonia in semi-urban Nepal; a cross-sectional study. BMC medicine **7**:  
775 1-12.  
776
- 777 **33.** Matthew J, Pinto Pereira LM, Pappas TE, Swenson CA, Grindle KA, Roberg KA,  
778 Lemanske RF, Lee W-M and Gern JE (2009). Distribution and seasonality of rhinovirus and  
779 other respiratory viruses in a cross-section of asthmatic children in Trinidad, West Indies.  
780 Italian Journal of Pediatrics **35**(1): 1-10.  
781
- 782 **34.** Metcalf CJE, Bjørnstad O, Ferrari M, Klepac P, Bharti N, Lopez-Gatell H and Grenfell BT  
783 (2011). The epidemiology of rubella in Mexico: seasonality, stochasticity and regional  
784 variation. Epidemiology & Infection **139**(7): 1029-1038.  
785
- 786 **35.** Metcalf CJE, Bjørnstad ON, Grenfell BT and Andreasen V (2009). Seasonality and  
787 comparative dynamics of six childhood infections in pre-vaccination Copenhagen. Proceedings  
788 of the Royal Society B: Biological Sciences **276**(1676): 4111-4118.  
789
- 790 **36.** Muench H (1959). Catalytic models in epidemiology, Harvard University Press.  
791
- 792 **37.** Munywoki PK, Koech DC, Agoti CN, Lewa C, Cane PA, Medley GF and Nokes DJ (2014).  
793 The source of respiratory syncytial virus infection in infants: a household cohort study in rural  
794 Kenya. The Journal of Infectious Diseases **209**(11): 1685-1692.  
795
- 796 **38.** Nair H, Nokes DJ, Gessner BD, Dherani M, Madhi SA, Singleton RJ, O'Brien KL, Roca  
797 A, Wright PF and Bruce N (2010). Global burden of acute lower respiratory infections due to  
798 respiratory syncytial virus in young children: a systematic review and meta-analysis. The  
799 Lancet **375**(9725): 1545-1555.  
800
- 801 **39.** Nakajo K and Nishiura H (2023). Age-dependent risk of respiratory syncytial virus  
802 infection: A systematic review and hazard modeling from serological data. The Journal of  
803 Infectious Diseases: jiad147.  
804
- 805 **40.** NASA National Aeronautics and Space Administration (NASA) database  
806

- 807 **41.** O'Brien KL, Baggett HC, Brooks WA, Feikin DR, Hammitt LL, Higdon MM, Howie SR,  
808 Knoll MD, Kotloff KL and Levine OS (2019). Causes of severe pneumonia requiring hospital  
809 admission in children without HIV infection from Africa and Asia: the PERCH multi-country  
810 case-control study. The Lancet **394**(10200): 757-779.  
811
- 812 **42.** Obando-Pacheco P, Justicia-Grande AJ, Rivero-Calle I, Rodríguez-Tenreiro C, Sly P,  
813 Ramilo O, Mejías A, Baraldi E, Papadopoulos NG, Nair H, Nunes MC, Kragten-Tabatabaie L,  
814 Heikkinen T, Greenough A, Stein RT, Manzoni P, Bont L and Martínón-Torres F (2018).  
815 Respiratory Syncytial Virus Seasonality: A Global Overview. The Journal of Infectious  
816 Diseases **217**(9): 1356-1364.  
817
- 818 **43.** Obolski U, Kassem E, Na'amnih W, Tannous S, Kagan V and Muhsen K (2021).  
819 Unnecessary antibiotic treatment of children hospitalised with respiratory syncytial virus (RSV)  
820 bronchiolitis: risk factors and prescription patterns. Journal of Global Antimicrobial Resistance  
821 **27**: 303-308.  
822
- 823 **44.** Peret TC, Hall CB, Schnabel KC, Golub JA and Anderson LJ (1998). Circulation patterns  
824 of genetically distinct group A and B strains of human respiratory syncytial virus in a  
825 community. J Gen Virol **79** ( Pt 9): 2221-2229.  
826
- 827 **45.** Pinquier D, Crépey P, Tissières P, Vabret A, Roze JC, Dubos F, Cahn-Sellem F, Javouhey  
828 E, Cohen R and Weil-Olivier C (2023). Preventing Respiratory Syncytial Virus in Children in  
829 France: A Narrative Review of the Importance of a Reinforced Partnership Between Parents,  
830 Healthcare Professionals, and Public Health Authorities. Infect Dis Ther **12**(2): 317-332.  
831
- 832 **46.** Pitzer VE, Viboud C, Alonso WJ, Wilcox T, Metcalf CJ, Steiner CA, Haynes AK and  
833 Grenfell BT (2015). Environmental drivers of the spatiotemporal dynamics of respiratory  
834 syncytial virus in the United States. PLoS Pathogens **11**(1): e1004591.  
835
- 836 **47.** Pomeroy LW, Bjørnstad ON, Kim H, Jumbo SD, Abdoukadi S and Garabed R (2015).  
837 Serotype-specific transmission and waning immunity of endemic foot-and-mouth disease virus  
838 in Cameroon. PLoS One **10**(9): e0136642.  
839
- 840 **48.** Rabarison JH, Rakotondramanga JM, Ratovoson R, Masquelier B, Rasoanomenjanahary  
841 AM, Dreyfus A, Garchitorena A, Rasambainarivo F, Razanajatovo NH, Andriamandimby SF,  
842 Metcalf CJ, Lacoste V, Heraud JM and Dussart P (2023). Excess mortality associated with the  
843 COVID-19 pandemic during the 2020 and 2021 waves in Antananarivo, Madagascar. BMJ  
844 Glob Health **8**(7).  
845
- 846 **49.** Rabarison JH, Tempia S, Harimanana A, Guillebaud J, Razanajatovo NH, Ratsitorahina M  
847 and Heraud JM (2019). Burden and epidemiology of influenza-and respiratory syncytial virus-  
848 associated severe acute respiratory illness hospitalization in Madagascar, 2011-2016. Influenza  
849 and Other Respiratory Viruses **13**(2): 138-147.  
850
- 851 **50.** Randrianasolo L, Raelina Y, Ravololomanana L, Randrianarivo-Solofoniaina A, Héraud  
852 J-M and Richard V (2010). Surveillance sentinelle des fièvres à Madagascar. Revue  
853 d'Épidémiologie et de Santé Publique **58**: S88.  
854
- 855 **51.** Rasolofonirina N (2003). Historique de la grippe à Madagascar. Archives de l'Institut  
856 Pasteur de Madagascar **69**(1).

- 857  
858 **52.** Razafimahatratra SL, Ndiaye MDB, Rasoloharimanana LT, Dussart P, Sahondranirina PH,  
859 Randriamanantany ZA and Schoenhals M (2021). Seroprevalence of ancestral and Beta SARS-  
860 CoV-2 antibodies in Malagasy blood donors. *The Lancet global health* **9**(10): e1363-e1364.  
861
- 862 **53.** Razanajatovo NH, Guillebaud J, Harimanana A, Rajatonirina S, Ratsima EH, Andrianirina  
863 ZZ, Rakotoariniaina H, Andriatahina T, Orelle A, Ratovoson R, Irinantenaina J,  
864 Rakotonanahary DA, Ramparany L, Randrianirina F, Richard V and Heraud JM (2018).  
865 Epidemiology of severe acute respiratory infections from hospital-based surveillance in  
866 Madagascar, November 2010 to July 2013. *PLoS One* **13**(11): e0205124.  
867
- 868 **54.** Razanajatovo NH, Randriambolamanantsoa TH, Rabarison JH, Randrianasolo L,  
869 Ankasitrahana MF, Ratsimbazafy A, Rahehinandrasana AH, Razafimanjato H, Raharinosy V,  
870 Andriamandimby SF, Heraud JM, Dussart P and Lacoste V (2022). Epidemiological Patterns  
871 of Seasonal Respiratory Viruses during the COVID-19 Pandemic in Madagascar, March 2020-  
872 May 2022. *Viruses* **15**(1).  
873
- 874 **55.** Razanajatovo NH, Richard V, Hoffmann J, Reynes JM, Razafitrimo GM, Randremanana  
875 RV and Heraud JM (2011). Viral etiology of influenza-like illnesses in Antananarivo,  
876 Madagascar, July 2008 to June 2009. *PLoS One* **6**(3): e17579.  
877
- 878 **56.** Razanajatovo Rahombanjanahary NH, Rybkina K, Randriambolamanantsoa TH,  
879 Razafimanjato H and Heraud JM (2020). Genetic diversity and molecular epidemiology of  
880 respiratory syncytial virus circulated in Antananarivo, Madagascar, from 2011 to 2017:  
881 Predominance of ON1 and BA9 genotypes. *J Clin Virol* **129**: 104506.  
882
- 883 **57.** Reis J and Shaman J (2016). Retrospective Parameter Estimation and Forecast of  
884 Respiratory Syncytial Virus in the United States. *PLoS Comput Biol* **12**(10): e1005133.  
885
- 886 **58.** Reis J and Shaman J (2018). Simulation of four respiratory viruses and inference of  
887 epidemiological parameters. *Infectious Disease Modelling* **3**: 23-34.  
888
- 889 **59.** Rm A (1991). Infectious diseases of humans. *Aust J Public Health* **16**: 208-212.  
890
- 891 **60.** Sapin G, Michault A and Simac C (2001). Seasonal trends of respiratory syncytial virus  
892 infections on Reunion Island gathering data among hospitalized children. *Bulletin de la Societe*  
893 *de Pathologie Exotique* (1990) **94**(1): 3-4.  
894
- 895 **61.** Shi T, McAllister DA, O'Brien KL, Simoes EA, Madhi SA, Gessner BD, Polack FP,  
896 Balsells E, Acacio S and Aguayo C (2017). Global, regional, and national disease burden  
897 estimates of acute lower respiratory infections due to respiratory syncytial virus in young  
898 children in 2015: a systematic review and modelling study. *The Lancet* **390**(10098): 946-958.  
899
- 900 **62.** Wambua J, Munywoki PK, Coletti P, Nyawanda BO, Murunga N, Nokes DJ and Hens N  
901 (2022). Drivers of respiratory syncytial virus seasonal epidemics in children under 5 years in  
902 Kilifi, coastal Kenya. *PLoS One* **17**(11): e0278066.  
903
- 904 **63.** Weber A, Weber M and Milligan P (2001). Modeling epidemics caused by respiratory  
905 syncytial virus (RSV). *Math Biosci* **172**(2): 95-113.  
906

- 907 **64.** Wesolowski A, Mensah K, Brook CE, Andrianjafimasy M, Winter A, Buckee CO,  
908 Razafindratsimandresy R, Tatem AJ, Heraud J-M and Metcalf CJE (2016). Introduction of  
909 rubella-containing-vaccine to Madagascar: implications for roll-out and local elimination.  
910 Journal of the Royal Society Interface **13**(117): 20151101.  
911
- 912 **65.** White L, Mandl J, Gomes M, Bodley-Tickell A, Cane P, Perez-Brena P, Aguilar J, Siqueira  
913 M, Portes S and Stralioetto S (2007). Understanding the transmission dynamics of respiratory  
914 syncytial virus using multiple time series and nested models. Math Biosci **209**(1): 222-239.  
915
- 916 **66.** WHO (2002). WHO Manual on Animal Influenza Diagnosis and Surveillance. 105.  
917
- 918 **67.** WHO (2011). Manual for the laboratory diagnosis and virological surveillance of influenza,  
919 World Health Organization.  
920
- 921 **68.** WHO (2013). Global epidemiological surveillance standards for influenza. 84.  
922
- 923 **69.** Wood SN (2001). mgcv: GAMs and generalized ridge regression for R. R news **1**(2): 20-  
924 25.  
925  
926  
927
